# Supplementary material for: Strong functional patterns in the evolution of eukaryotic genomes revealed by the reconstruction of ancestral protein domain repertoires
Source: PubMed Central journal article supplement (PMC3091302; doi:10.1186/gb-2011-12-1-r4), 2011-01-17

|                             | Pfam 22.0 (9318 families)<br>HMMER 2.3.2 | Pfam 24.0 (11912 families)<br>HMMER 3.0b3 |              |                  |                                     |                |                     |                     |                     |                      |                      |
|-----------------------------|------------------------------------------|-------------------------------------------|--------------|------------------|-------------------------------------|----------------|---------------------|---------------------|---------------------|----------------------|----------------------|
|                             |                                          | Gathering cutoff, Pfam 22.0               | Noise cutoff | Gathering cutoff | Gathering cutoff, without parasites | Trusted cutoff | 1E-4 E-value cutoff | 1E-6 E-value cutoff | 1E-8 E-value cutoff | 1E-10 E-value cutoff | 1E-12 E-value cutoff |
| LECA                        | 3392                                     | 4520                                      | 4431         | 4344             | 4387                                | 4995           | 4437                | 4210                | 4048                | 3904                 | 3547                 |
| Chromalveolata              | 3056                                     | 4053                                      | 4008         | 3917             | 3964                                | 4359           | 3950                | 3754                | 3612                | 3465                 | 3043                 |
| Viridplantae (green plants) | 3326                                     | 4249                                      | 4200         | 4182             | 4172                                | 4569           | 4190                | 4026                | 3891                | 3779                 | 3424                 |
| Dikarya (fungi)             | 2873                                     | 3759                                      | 3709         | 3658             | 3631                                | 4071           | 3673                | 3525                | 3424                | 3325                 | 3031                 |
| Metazoa (animals)           | 3472                                     | 4588                                      | 4503         | 4467             | 4462                                | 5139           | 4555                | 4325                | 4168                | 4058                 | 3695                 |
| Prostomia                   | 3511                                     | 4571                                      | 4508         | 4487             | 4473                                | 4960           | 4523                | 4338                | 4227                | 4122                 | 3791                 |
| Deuterostomia               | 3443                                     | 4437                                      | 4389         | 4378             | 4355                                | 4883           | 4478                | 4298                | 4184                | 4089                 | 3774                 |
| Lophotrochozoa              | 3325                                     | 4247                                      | 4215         | 4209             | 4187                                | 4552           | 4229                | 4083                | 3989                | 3865                 | 3496                 |
| Ecdysozoa                   | 3149                                     | 4079                                      | 4032         | 4014             | 4003                                | 4352           | 4030                | 3883                | 3781                | 3697                 | 3417                 |
| Human                       | 3471                                     | 4244                                      | 4239         | 4239             | 4231                                | 4331           | 4246                | 4182                | 4126                | 4075                 | 3857                 |
| Deuterostome domain gains   | 11                                       | 11                                        | 11           | 13               | 9                                   | 19             | 15                  | 16                  | 21                  | 16                   | 17                   |
| Deuterostome domain losses  | 238                                      | 398                                       | 366          | 347              | 359                                 | 528            | 355                 | 308                 | 301                 | 283                  | 253                  |
| Ecdysozoa domain gains      | 4                                        | 7                                         | 8            | 7                | 8                                   | 12             | 10                  | 9                   | 7                   | 7                    | 10                   |
| Ecdysozoa domain losses     | 366                                      | 499                                       | 484          | 480              | 478                                 | 620            | 503                 | 464                 | 453                 | 432                  | 383                  |

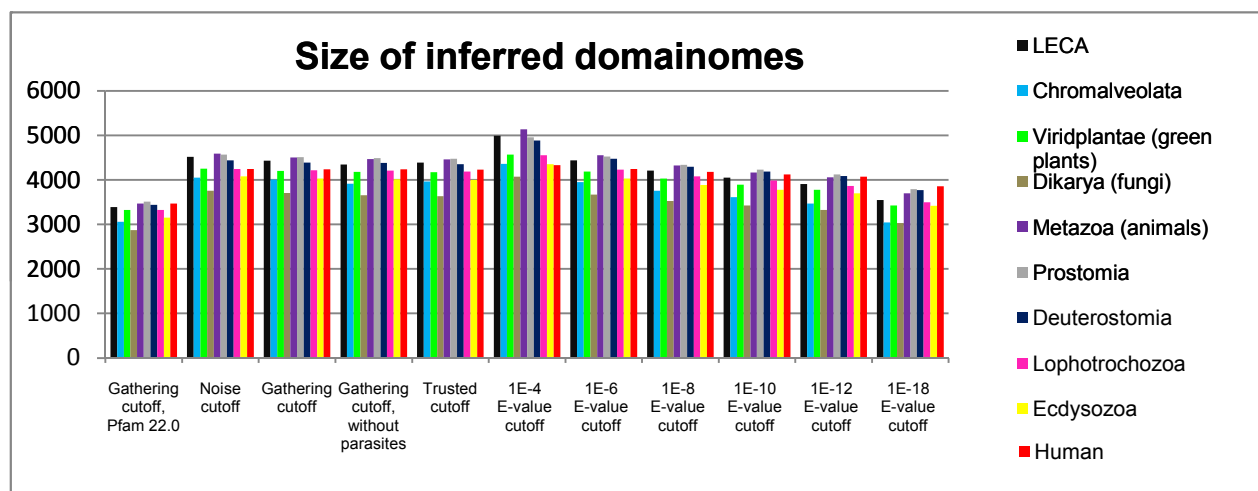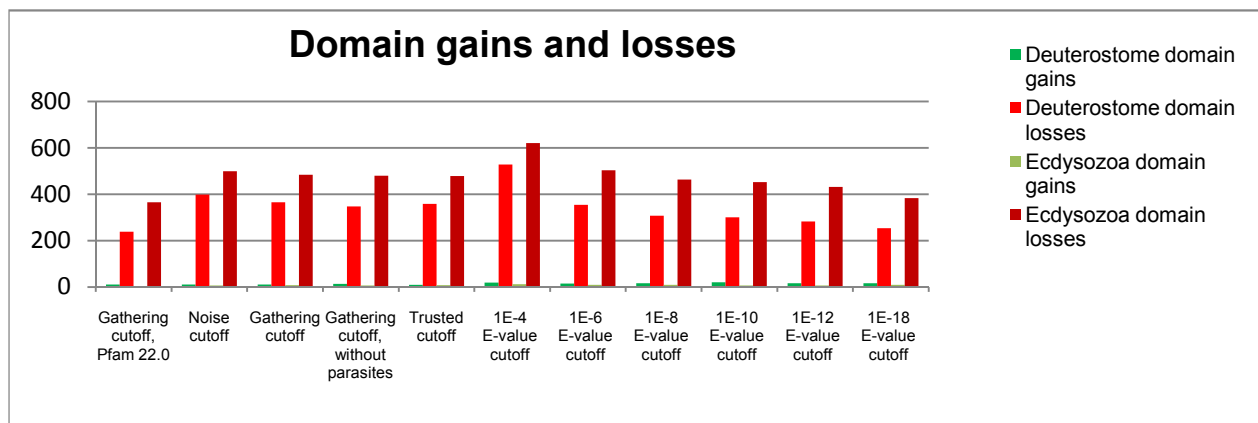

Supplement: gb-2011-12-1-r4-S12.pdf [file gb-2011-12-1-r4-S12.pdf]
