# Supplementary material for: Strong functional patterns in the evolution of eukaryotic genomes revealed by the reconstruction of ancestral protein domain repertoires
Source: Springer Nature journal article supplement (doi:10.1186/gb-2011-12-1-r4), 2011-01-17
Supplement: Additional file 14 [file gb-2011-12-1-r4-s14.pdf]

## 1. Calculation method: Topology-Weighted

|                                       | Enriched gained GO terms                                                                                                                                                   | P-value           | Enriched lost GO terms                                                                                                                                                                                          | P-value                              |
|---------------------------------------|----------------------------------------------------------------------------------------------------------------------------------------------------------------------------|-------------------|-----------------------------------------------------------------------------------------------------------------------------------------------------------------------------------------------------------------|--------------------------------------|
| <b>Unikonta</b>                       | <ul style="list-style-type: none"> <li>protein import into peroxisome matrix, docking</li> <li>cAMP catabolic process</li> </ul>                                           | 9.5E-3<br>1.9E-2  |                                                                                                                                                                                                                 |                                      |
| <b>Opisthokonta</b>                   | <ul style="list-style-type: none"> <li>regulation of transcription</li> <li>regulation of nucleobase, nucleoside, nucleotide and nucleic acid metabolic process</li> </ul> | 2.3E-2<br>2.8E-2  | <ul style="list-style-type: none"> <li>protein-heme linkage</li> <li>asparagine biosynthetic process</li> </ul>                                                                                                 | 5.2E-3<br>1.0E-2                     |
| <b>Metazoa &amp; Choanoflagellata</b> | <ul style="list-style-type: none"> <li>cell communication</li> <li>galactosylceramide catabolic process</li> </ul>                                                         | 3.6E-6<br>9.2E-3  | <ul style="list-style-type: none"> <li>xylan catabolic process</li> <li>hemicellulose metabolic process</li> <li>polysaccharide catabolic process *</li> </ul>                                                  | 1.6E-5<br>1.5E-4<br>3.2E-4           |
| <b>Metazoa</b>                        | <ul style="list-style-type: none"> <li>regulation of transcription, DNA-dependent</li> <li>transcription, DNA-dependent</li> </ul>                                         | 1.2E-7<br>1.8E-6  | <ul style="list-style-type: none"> <li>aromatic amino acid family biosynthetic process, prephenate pathway</li> <li>histidine biosynthetic process</li> </ul>                                                   | 1.1E-4<br>2.3E-3                     |
| <b>Bilaterian &amp; Cnidaria</b>      | <ul style="list-style-type: none"> <li>apoptosis</li> <li>peptide cross-linking</li> </ul>                                                                                 | 3.1E-4<br>4.7E-4  | <ul style="list-style-type: none"> <li>protein folding</li> <li>transcription initiation</li> </ul>                                                                                                             | 1.7E-3<br>3.8E-3                     |
| <b>Bilateria</b>                      | <ul style="list-style-type: none"> <li>mitochondrial electron transport, NADH to ubiquinone</li> <li>mitochondrial ATP synthesis coupled electron transport</li> </ul>     | 8.3E-6<br>1.1E-5  | <ul style="list-style-type: none"> <li>branched chain family amino acid biosynthetic process</li> <li>cellular amino acid biosynthetic process</li> <li>water-soluble vitamin biosynthetic process *</li> </ul> | 3.3E-4<br>6.3E-4<br>5.0E-3           |
| <b>Deuterostomia</b>                  | <ul style="list-style-type: none"> <li>protein transport</li> <li>protein localization</li> </ul>                                                                          | 8.1E-2<br>8.6E-2  | <ul style="list-style-type: none"> <li>dicarboxylic acid metabolic process</li> <li>phosphoenolpyruvate-dependent sugar phosphotransferase system</li> </ul>                                                    | 1.6E-3<br>3.2E-3                     |
| <b>Chordata</b>                       | <ul style="list-style-type: none"> <li>feeding behavior</li> <li>G-protein coupled receptor protein signaling pathway</li> </ul>                                           | 4.3E-5<br>7.0E-4  | <ul style="list-style-type: none"> <li>proteolysis</li> </ul>                                                                                                                                                   | 2.1E-2                               |
| <b>Urochordata &amp; Vertebrata</b>   | <ul style="list-style-type: none"> <li>antigen processing and presentation</li> <li>protein amino acid phosphorylation</li> </ul>                                          | 5.5E-3<br>1.8E-2  | <ul style="list-style-type: none"> <li>folic acid and derivative metabolic process</li> <li>group transfer coenzyme metabolic process</li> </ul>                                                                | 2.3E-3<br>5.8E-3                     |
| <b>Vertebrata</b>                     | <ul style="list-style-type: none"> <li>immune response</li> <li>cell surface receptor linked signal transduction</li> </ul>                                                | 4.4E-11<br>2.0E-6 | <ul style="list-style-type: none"> <li>DNA topological change</li> </ul>                                                                                                                                        | 2.0E-3                               |
| <b>Tetrapoda</b>                      | <ul style="list-style-type: none"> <li>regulation of growth</li> <li>synaptic transmission</li> </ul>                                                                      | 1.3E-2<br>2.0E-2  | <ul style="list-style-type: none"> <li>valyl-tRNA aminoacylation</li> <li>response to water</li> </ul>                                                                                                          | 4.3E-3<br>8.6E-3                     |
| <b>Amniota</b>                        | <ul style="list-style-type: none"> <li>immune response</li> <li>defense response</li> </ul>                                                                                | 1.8E-3<br>2.0E-3  | <ul style="list-style-type: none"> <li>regulation of transcription, DNA-dependent</li> <li>protein secretion</li> <li>riboflavin biosynthetic process *</li> <li>thiamin biosynthetic process *</li> </ul>      | 9.2E-8<br>5.1E-5<br>1.0E-3<br>1.8E-3 |
| <b>Mammalia</b>                       | <ul style="list-style-type: none"> <li>hemopoiesis</li> <li>reciprocal meiotic recombination</li> </ul>                                                                    | 2.8E-3<br>8.3E-3  | <ul style="list-style-type: none"> <li>aromatic amino acid family biosynthetic process</li> <li>chorismate metabolic process</li> </ul>                                                                         | 1.1E-2<br>1.3E-2                     |

## 2. Calculation method: Parent-Child-Union, multiple testing correction (MTC): Bonferroni

|                            | Enriched gained GO terms                                                                                                                                   | P-value<br>(adjusted)      | Enriched lost GO terms                                                                                                                         | P-value<br>(adjusted) |
|----------------------------|------------------------------------------------------------------------------------------------------------------------------------------------------------|----------------------------|------------------------------------------------------------------------------------------------------------------------------------------------|-----------------------|
| Unikonta                   |                                                                                                                                                            |                            |                                                                                                                                                |                       |
| Opisthokonta               |                                                                                                                                                            |                            |                                                                                                                                                |                       |
| Metazoa & Choanoflagellata | <ul style="list-style-type: none"> <li>cell communication</li> <li>biological regulation</li> </ul>                                                        | 1.3E-3<br>8.3E-2           | <ul style="list-style-type: none"> <li>carbohydrate metabolic process</li> <li>polysaccharide metabolic process</li> </ul>                     | 3.5E-4<br>3.0E-2      |
| Metazoa                    | <ul style="list-style-type: none"> <li>regulation of cellular process</li> <li>regulation of nitrogen compound metabolic process</li> </ul>                | 6.4E-15<br>6.5E-6          | <ul style="list-style-type: none"> <li>organic acid biosynthetic process</li> </ul>                                                            | 9.1E-2                |
| Bilaterian & Cnidaria      | <ul style="list-style-type: none"> <li>regulation of biosynthetic process</li> </ul>                                                                       | 3.6E-2                     |                                                                                                                                                |                       |
| Bilateria                  | <ul style="list-style-type: none"> <li>electron transport chain</li> <li>phosphorus metabolic process</li> <li>regulation of cellular process *</li> </ul> | 2.0E-2<br>3.4E-2<br>4.1E-2 |                                                                                                                                                |                       |
| Deuterostomia              |                                                                                                                                                            |                            | <ul style="list-style-type: none"> <li>organic acid metabolic process</li> <li>cellular amino acid and derivative metabolic process</li> </ul> | 4.7E-3<br>2.7E-2      |
| Chordata                   |                                                                                                                                                            |                            |                                                                                                                                                |                       |
| Urochordata & Vertebrata   |                                                                                                                                                            | 5.5E-3<br>1.8E-2           | <ul style="list-style-type: none"> <li>carbohydrate metabolic process</li> </ul>                                                               | 3.5E-2                |
| Vertebrata                 | <ul style="list-style-type: none"> <li>immune system process</li> <li>regulation of cellular process</li> </ul>                                            | 3.8E-8<br>4.9E-8           | <ul style="list-style-type: none"> <li>carbohydrate metabolic process</li> </ul>                                                               | 3.3E-2                |
| Tetrapoda                  |                                                                                                                                                            |                            |                                                                                                                                                |                       |
| Amniota                    | <ul style="list-style-type: none"> <li>response to stimulus</li> <li>immune system process</li> </ul>                                                      | 1.9E-2<br>8.3E-2           | <ul style="list-style-type: none"> <li>regulation of macromolecule metabolic process</li> <li>regulation of gene expression</li> </ul>         | 2.9E-3<br>1.4E-2      |
| Mammalia                   |                                                                                                                                                            |                            |                                                                                                                                                |                       |

### 3. Calculation method: Parent-Child-Intersection, multiple testing correction (MTC): Bonferroni

|                                       | Enriched gained GO terms                                                                                          | P-value<br>(adjusted) | Enriched lost GO terms                                                                                                                             | P-value<br>(adjusted) |
|---------------------------------------|-------------------------------------------------------------------------------------------------------------------|-----------------------|----------------------------------------------------------------------------------------------------------------------------------------------------|-----------------------|
| <b>Unikonta</b>                       |                                                                                                                   |                       |                                                                                                                                                    |                       |
| <b>Opisthokonta</b>                   |                                                                                                                   |                       |                                                                                                                                                    |                       |
| <b>Metazoa &amp; Choanoflagellata</b> | <ul style="list-style-type: none"> <li>• cell communication</li> <li>• biological regulation</li> </ul>           | 1.0E-3<br>6.3E-2      | <ul style="list-style-type: none"> <li>• carbohydrate metabolic process</li> </ul>                                                                 | 2.6E-4                |
| <b>Metazoa</b>                        | <ul style="list-style-type: none"> <li>• biological regulation</li> </ul>                                         | 4.3E-13               |                                                                                                                                                    |                       |
| <b>Bilaterian &amp; Cnidaria</b>      |                                                                                                                   |                       |                                                                                                                                                    |                       |
| <b>Bilateria</b>                      | <ul style="list-style-type: none"> <li>• phosphorus metabolic process</li> <li>• biological regulation</li> </ul> | 2.4E-2<br>3.4E-2      |                                                                                                                                                    |                       |
| <b>Deuterostomia</b>                  |                                                                                                                   |                       | <ul style="list-style-type: none"> <li>• organic acid metabolic process</li> <li>• cellular amino acid and derivative metabolic process</li> </ul> | 3.3E-3<br>8.0E-3      |
| <b>Chordata</b>                       |                                                                                                                   |                       |                                                                                                                                                    |                       |
| <b>Urochordata &amp; Vertebrata</b>   |                                                                                                                   | 5.5E-3<br>1.8E-2      | <ul style="list-style-type: none"> <li>• cellular nitrogen compound metabolic process</li> <li>• carbohydrate metabolic process</li> </ul>         | 2.2E-2<br>2.7E-2      |
| <b>Vertebrata</b>                     | <ul style="list-style-type: none"> <li>• immune system process</li> <li>• biological regulation</li> </ul>        | 2.2E-8<br>1.7E-7      | <ul style="list-style-type: none"> <li>• carbohydrate metabolic process</li> </ul>                                                                 | 2.6E-2                |
| <b>Tetrapoda</b>                      |                                                                                                                   |                       |                                                                                                                                                    |                       |
| <b>Amniota</b>                        | <ul style="list-style-type: none"> <li>• response to stimulus</li> <li>• immune system process</li> </ul>         | 1.6E-2<br>7.2E-2      |                                                                                                                                                    |                       |
| <b>Mammalia</b>                       |                                                                                                                   |                       |                                                                                                                                                    |                       |

#### 4. Calculation method: Term-For-Term, multiple testing correction (MTC): Bonferroni

|                                       | Enriched gained GO terms                                                                                                                                                  | P-value<br>(adjusted)        | Enriched lost GO terms                                                                                                                         | P-value<br>(adjusted) |
|---------------------------------------|---------------------------------------------------------------------------------------------------------------------------------------------------------------------------|------------------------------|------------------------------------------------------------------------------------------------------------------------------------------------|-----------------------|
| <b>Unikonta</b>                       |                                                                                                                                                                           |                              |                                                                                                                                                |                       |
| <b>Opisthokonta</b>                   |                                                                                                                                                                           |                              |                                                                                                                                                |                       |
| <b>Metazoa &amp; Choanoflagellata</b> | <ul style="list-style-type: none"> <li>cell communication</li> <li>signal transduction</li> </ul>                                                                         | 1.0E-3<br>3.4E-2             | <ul style="list-style-type: none"> <li>carbohydrate metabolic process</li> <li>xylan metabolic process</li> </ul>                              | 1.5E-4<br>7.6E-3      |
| <b>Metazoa</b>                        | <ul style="list-style-type: none"> <li>regulation of cellular process</li> <li>regulation of biological process</li> <li>regulation of RNA metabolic process *</li> </ul> | 5.2E-11<br>3.0E-10<br>5.1E-5 | <ul style="list-style-type: none"> <li>aromatic amino acid family biosynthetic process, prephenate pathway</li> </ul>                          | 2.6E-2                |
| <b>Bilaterian &amp; Cnidaria</b>      |                                                                                                                                                                           |                              |                                                                                                                                                |                       |
| <b>Bilateria</b>                      | <ul style="list-style-type: none"> <li>mitochondrial electron transport, NADH to ubiquinone</li> <li>ATP synthesis coupled electron transport</li> </ul>                  | 3.7E-3<br>6.1E-2             | <ul style="list-style-type: none"> <li>organic acid biosynthetic process</li> </ul>                                                            | 5.1E-2                |
| <b>Deuterostomia</b>                  |                                                                                                                                                                           |                              | <ul style="list-style-type: none"> <li>organic acid metabolic process</li> <li>cellular amino acid and derivative metabolic process</li> </ul> | 4.8E-3<br>9.9E-3      |
| <b>Chordata</b>                       | <ul style="list-style-type: none"> <li>feeding behavior</li> <li>digestion</li> </ul>                                                                                     | 9.1E-3<br>2.7E-2             |                                                                                                                                                |                       |
| <b>Urochordata &amp; Vertebrata</b>   |                                                                                                                                                                           | 5.5E-3<br>1.8E-2             | <ul style="list-style-type: none"> <li>carbohydrate metabolic process</li> </ul>                                                               | 3.5E-2                |
| <b>Vertebrata</b>                     | <ul style="list-style-type: none"> <li>immune response</li> <li>biological regulation</li> </ul>                                                                          | 2.2E-8<br>9.0E-6             | <ul style="list-style-type: none"> <li>carbohydrate metabolic process</li> </ul>                                                               | 1.3E-2                |
| <b>Tetrapoda</b>                      |                                                                                                                                                                           |                              |                                                                                                                                                |                       |
| <b>Amniota</b>                        | <ul style="list-style-type: none"> <li>response to stimulus</li> <li>immune response</li> </ul>                                                                           | 4.6E-2<br>9.1E-2             | <ul style="list-style-type: none"> <li>regulation of RNA metabolic process</li> <li>transcription, DNA-dependent</li> </ul>                    | 4.9E-5<br>2.5E-4      |
| <b>Mammalia</b>                       | <ul style="list-style-type: none"> <li>system development</li> </ul>                                                                                                      | 2.7E-2                       |                                                                                                                                                |                       |

## 5. Calculation method: Term-For-Term, multiple testing correction (MTC): Westfall-Young-Single-Step

|                                       | Enriched gained GO terms                                                                                                                                                       | P-value<br>(adjusted) | Enriched lost GO terms                                                                                                                         | P-value<br>(adjusted) |
|---------------------------------------|--------------------------------------------------------------------------------------------------------------------------------------------------------------------------------|-----------------------|------------------------------------------------------------------------------------------------------------------------------------------------|-----------------------|
| <b>Unikonta</b>                       |                                                                                                                                                                                |                       |                                                                                                                                                |                       |
| <b>Opisthokonta</b>                   |                                                                                                                                                                                |                       |                                                                                                                                                |                       |
| <b>Metazoa &amp; Choanoflagellata</b> | <ul style="list-style-type: none"> <li>cell communication</li> <li>signal transduction</li> </ul>                                                                              | 2.0E-3<br>4.2E-2      | <ul style="list-style-type: none"> <li>carbohydrate metabolic process</li> <li>xylan metabolic process</li> </ul>                              | 0<br>6.0E-3           |
| <b>Metazoa</b>                        | <ul style="list-style-type: none"> <li>biological regulation</li> <li>transcription</li> <li>signal transduction *</li> </ul>                                                  | 0<br>3.8E-2<br>4.6E-2 | <ul style="list-style-type: none"> <li>aromatic amino acid family biosynthetic process, prephenate pathway</li> </ul>                          | 6.4E-2                |
| <b>Bilaterian &amp; Cnidaria</b>      | <ul style="list-style-type: none"> <li>programmed cell death</li> </ul>                                                                                                        | 7.6E-2                |                                                                                                                                                |                       |
| <b>Bilateria</b>                      | <ul style="list-style-type: none"> <li>mitochondrial electron transport, NADH to ubiquinone</li> <li>ATP synthesis coupled electron transport</li> </ul>                       | 2.0E-3<br>3.2E-2      | <ul style="list-style-type: none"> <li>organic acid biosynthetic process</li> </ul>                                                            | 6.8E-2                |
| <b>Deuterostomia</b>                  |                                                                                                                                                                                |                       | <ul style="list-style-type: none"> <li>organic acid metabolic process</li> <li>cellular amino acid and derivative metabolic process</li> </ul> | 4.0E-3<br>8.0E-3      |
| <b>Chordata</b>                       | <ul style="list-style-type: none"> <li>feeding behavior</li> <li>digestion</li> </ul>                                                                                          | 2.0E-2<br>5.8E-2      |                                                                                                                                                |                       |
| <b>Urochordata &amp; Vertebrata</b>   |                                                                                                                                                                                |                       |                                                                                                                                                |                       |
| <b>Vertebrata</b>                     | <ul style="list-style-type: none"> <li>biological regulation</li> <li>cell surface receptor linked signal transduction</li> <li>antigen processing and presentation</li> </ul> | 0<br>2.0E-3<br>6.0E-3 | <ul style="list-style-type: none"> <li>carbohydrate metabolic process</li> </ul>                                                               | 2.0E-2                |
| <b>Tetrapoda</b>                      |                                                                                                                                                                                |                       |                                                                                                                                                |                       |
| <b>Amniota</b>                        |                                                                                                                                                                                |                       | <ul style="list-style-type: none"> <li>regulation of RNA metabolic process</li> <li>regulation of macromolecule metabolic process</li> </ul>   | 0<br>2.0E-3           |
| <b>Mammalia</b>                       | <ul style="list-style-type: none"> <li>system development</li> </ul>                                                                                                           | 4.4E-2                |                                                                                                                                                |                       |

## 6. Calculation method: Term-For-Term, multiple testing correction (MTC): Westfall-Young-Step-Down

|                                       | Enriched gained GO terms                                                                                                                                         | P-value<br>(adjusted)      | Enriched lost GO terms                                                                                                                         | P-value<br>(adjusted) |
|---------------------------------------|------------------------------------------------------------------------------------------------------------------------------------------------------------------|----------------------------|------------------------------------------------------------------------------------------------------------------------------------------------|-----------------------|
| <b>Unikonta</b>                       |                                                                                                                                                                  |                            |                                                                                                                                                |                       |
| <b>Opisthokonta</b>                   |                                                                                                                                                                  |                            |                                                                                                                                                |                       |
| <b>Metazoa &amp; Choanoflagellata</b> | <ul style="list-style-type: none"> <li>cell communication</li> <li>signal transduction</li> </ul>                                                                | 0<br>3.6E-2                | <ul style="list-style-type: none"> <li>carbohydrate metabolic process</li> <li>xylan metabolic process</li> </ul>                              | 1.0E-3<br>8.0E-3      |
| <b>Metazoa</b>                        | <ul style="list-style-type: none"> <li>regulation of cellular process</li> <li>transcription</li> <li>signal transduction *</li> </ul>                           | 0<br>3.9E-2<br>5.4E-2      | <ul style="list-style-type: none"> <li>aromatic amino acid family biosynthetic process, prephenate pathway</li> </ul>                          | 4.8E-2                |
| <b>Bilaterian &amp; Cnidaria</b>      | <ul style="list-style-type: none"> <li>programmed cell death</li> </ul>                                                                                          | 7.1E-2                     |                                                                                                                                                |                       |
| <b>Bilateria</b>                      | <ul style="list-style-type: none"> <li>mitochondrial electron transport, NADH to ubiquinone</li> <li>ATP synthesis coupled electron transport</li> </ul>         | 1.0E-3<br>2.7E-2           | <ul style="list-style-type: none"> <li>organic acid metabolic process</li> <li>organic acid biosynthetic process</li> </ul>                    | 1.0E-3<br>5.0E-3      |
| <b>Deuterostomia</b>                  |                                                                                                                                                                  |                            | <ul style="list-style-type: none"> <li>organic acid metabolic process</li> <li>cellular amino acid and derivative metabolic process</li> </ul> | 4.8E-3<br>9.9E-3      |
| <b>Chordata</b>                       | <ul style="list-style-type: none"> <li>feeding behavior</li> <li>digestion</li> </ul>                                                                            | 2.8E-2<br>6.1E-2           |                                                                                                                                                |                       |
| <b>Urochordata &amp; Vertebrata</b>   |                                                                                                                                                                  |                            |                                                                                                                                                |                       |
| <b>Vertebrata</b>                     | <ul style="list-style-type: none"> <li>biological regulation</li> <li>multicellular organismal process</li> <li>antigen processing and presentation *</li> </ul> | 1.0E-3<br>5.0E-3<br>9.0E-3 | <ul style="list-style-type: none"> <li>carbohydrate metabolic process</li> </ul>                                                               | 3.2E-2                |
| <b>Tetrapoda</b>                      |                                                                                                                                                                  |                            |                                                                                                                                                |                       |
| <b>Amniota</b>                        | <ul style="list-style-type: none"> <li>response to stimulus</li> </ul>                                                                                           | 9.9E-2                     | <ul style="list-style-type: none"> <li>regulation of RNA metabolic process</li> <li>RNA biosynthetic process</li> </ul>                        | 0<br>1.0E-3           |
| <b>Mammalia</b>                       | <ul style="list-style-type: none"> <li>system development</li> </ul>                                                                                             | 5.5E-2                     |                                                                                                                                                |                       |
