# Supplementary material for: Strong functional patterns in the evolution of eukaryotic genomes revealed by the reconstruction of ancestral protein domain repertoires
Source: PubMed Central journal article supplement (PMC3091302; doi:10.1186/gb-2011-12-1-r4), 2011-01-17

**Bold numbers** are domain counts for nodes with no corresponding node in the 'modern' eukaryote evolutionary tree.

Blue bracketed numbers are domain count differences to LECA of 'modern' eukaryote evolutionary tree.

Black bracketed numbers are domain count differences to corresponding node of 'modern' eukaryote evolutionary tree.

Numbers of distinct domains per genome in extant species (for groups of species represented as triangles, these numbers are averages; species, or groups of species, which are mostly parasitic are shown in grey):

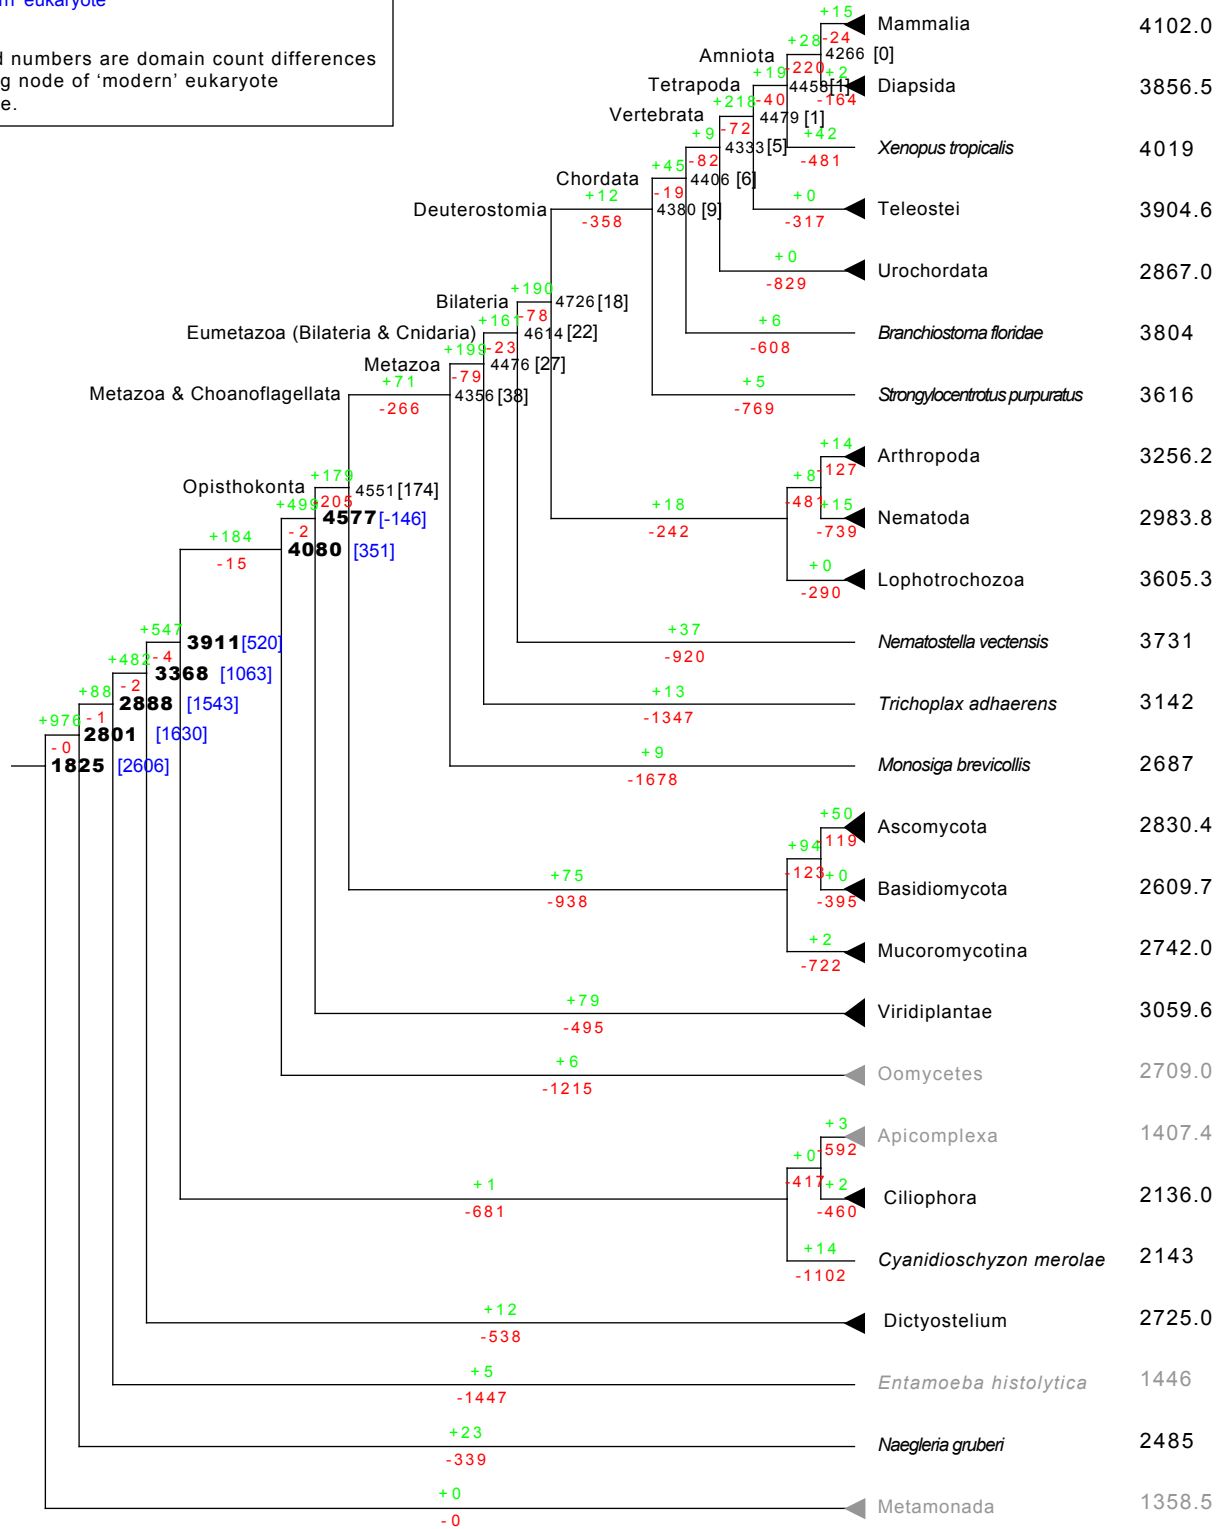

Supplement: gb-2011-12-1-r4-S8.pdf [file gb-2011-12-1-r4-S8.pdf]
