# Supplementary material for: Strong functional patterns in the evolution of eukaryotic genomes revealed by the reconstruction of ancestral protein domain repertoires
Source: PubMed Central journal article supplement (PMC3091302; doi:10.1186/gb-2011-12-1-r4), 2011-01-17
Supplement: gb-2011-12-1-r4-S9.pdf [file gb-2011-12-1-r4-S9.pdf]

|                                                            | Enriched gained GO terms                                                                                                                         | P-value           | Enriched lost GO terms                                                                                                                                            | P-value          |
|------------------------------------------------------------|--------------------------------------------------------------------------------------------------------------------------------------------------|-------------------|-------------------------------------------------------------------------------------------------------------------------------------------------------------------|------------------|
| <b>Unikonta</b>                                            | <ul style="list-style-type: none"> <li>protein import into peroxisome matrix, docking</li> <li>cAMP catabolic process</li> </ul>                 | 9.5E-3<br>1.9E-2  |                                                                                                                                                                   |                  |
| <b>Opisthokonta</b>                                        | <ul style="list-style-type: none"> <li>regulation of primary metabolic process</li> </ul>                                                        | 1.3E-2            | <ul style="list-style-type: none"> <li>protein-heme linkage</li> <li>asparagine biosynthetic process</li> </ul>                                                   | 5.2E-3<br>1.0E-2 |
| <b>Metazoa &amp; Choanoflagellata</b>                      | <ul style="list-style-type: none"> <li>cell-cell signaling</li> <li>cell surface receptor linked signal transduction</li> </ul>                  | 2.2E-3<br>9.2E-3  | <ul style="list-style-type: none"> <li>xylan catabolic process</li> <li>carbohydrate metabolic process</li> </ul>                                                 | 1.6E-5<br>3.1E-4 |
| <b>Metazoa</b>                                             | <ul style="list-style-type: none"> <li>regulation of transcription, DNA-dependent</li> <li>cell-matrix adhesion</li> </ul>                       | 1.2E-7<br>4.0E-4  | <ul style="list-style-type: none"> <li>aromatic amino acid family biosynthetic process, prephenate pathway</li> <li>histidine biosynthetic process</li> </ul>     | 1.1E-4<br>2.3E-3 |
| <b>Bilaterian &amp; Cnidaria</b>                           | <ul style="list-style-type: none"> <li>apoptosis</li> <li>peptide cross-linking</li> </ul>                                                       | 3.1E-4<br>4.7E-4  | <ul style="list-style-type: none"> <li>protein folding</li> <li>transcription initiation</li> </ul>                                                               | 1.7E-3<br>3.8E-3 |
| <b>Bilateria</b>                                           | <ul style="list-style-type: none"> <li>multicellular organismal development</li> <li>cell surface receptor linked signal transduction</li> </ul> | 1.2E-2<br>1.7E-2  | <ul style="list-style-type: none"> <li>branched chain family amino acid biosynthetic process</li> <li>histidine biosynthetic process</li> </ul>                   | 3.3E-4<br>2.3E-3 |
| <b>Deuterostomia &amp; Protostomia &amp; Aschelminthes</b> | <ul style="list-style-type: none"> <li>mitochondrial ATP synthesis coupled electron transport</li> <li>developmental process</li> </ul>          | 8.8E-4<br>5.3E-3  | <ul style="list-style-type: none"> <li>DNA replication</li> </ul>                                                                                                 | 1.3E-3           |
| <b>Deuterostomia &amp; Protostomia</b>                     | <ul style="list-style-type: none"> <li>mitochondrial electron transport, NADH to ubiquinone</li> <li>Wnt receptor signaling pathway</li> </ul>   | 4.8E-4<br>3.2E-3  | <ul style="list-style-type: none"> <li>DNA integration</li> <li>metal ion transport</li> </ul>                                                                    | 9.2E-3<br>1.2E-2 |
| <b>Deuterostomia</b>                                       | <ul style="list-style-type: none"> <li>protein transport</li> </ul>                                                                              | 8.2E-2            | <ul style="list-style-type: none"> <li>cellular amino acid biosynthetic process</li> <li>phosphoenolpyruvate-dependent sugar phosphotransferase system</li> </ul> | 4.7E-4<br>2.7E-3 |
| <b>Chordata</b>                                            | <ul style="list-style-type: none"> <li>lipid catabolic process</li> <li>activation of MAPKK activity</li> </ul>                                  | 3.2E-3<br>6.7E-3  | <ul style="list-style-type: none"> <li>proteolysis</li> </ul>                                                                                                     | 2.1E-2           |
| <b>Urochordata &amp; Vertebrata</b>                        | <ul style="list-style-type: none"> <li>antigen processing and presentation</li> <li>protein amino acid phosphorylation</li> </ul>                | 5.5E-3<br>1.8E-2  | <ul style="list-style-type: none"> <li>folic acid and derivative metabolic process</li> <li>oligosaccharide biosynthetic process</li> </ul>                       | 2.3E-3<br>3.0E-3 |
| <b>Vertebrata</b>                                          | <ul style="list-style-type: none"> <li>immune response</li> <li>G-protein coupled receptor protein signaling pathway</li> </ul>                  | 4.4E-11<br>1.6E-5 | <ul style="list-style-type: none"> <li>DNA topological change</li> <li>carbohydrate metabolic process</li> </ul>                                                  | 2.0E-3<br>3.1E-3 |
| <b>Tetrapoda</b>                                           | <ul style="list-style-type: none"> <li>regulation of growth</li> <li>synaptic transmission</li> </ul>                                            | 1.3E-2<br>2.0E-2  | <ul style="list-style-type: none"> <li>valyl-tRNA aminoacylation</li> <li>response to water</li> </ul>                                                            | 4.3E-3<br>8.6E-3 |
| <b>Amniota</b>                                             | <ul style="list-style-type: none"> <li>immune response</li> <li>defense response</li> </ul>                                                      | 1.8E-3<br>2.0E-3  | <ul style="list-style-type: none"> <li>regulation of transcription, DNA-dependent</li> <li>riboflavin biosynthetic process</li> </ul>                             | 9.2E-8<br>1.0E-3 |
| <b>Mammalia</b>                                            | <ul style="list-style-type: none"> <li>hemopoiesis</li> <li>reciprocal meiotic recombination</li> </ul>                                          | 2.8E-3<br>8.3E-3  | <ul style="list-style-type: none"> <li>aromatic amino acid family biosynthetic process</li> </ul>                                                                 | 1.1E-2           |
